# Supplementary material for: Integration of large-scale community-developed causal loop diagrams: a Natural Language Processing approach to merging factors based on semantic similarity
Source: Springer Nature journal article supplement (doi:10.1186/s12889-025-22142-3), 2025-03-08
Supplement: MOESM1 [file 12889_2025_22142_MOESM1_ESM.pdf]

| Set ID | Factor name                                   | Set ID | Factor name                                |
|--------|-----------------------------------------------|--------|--------------------------------------------|
| 1      | alcohol and drug abuse                        | 17     | gaming                                     |
| 1      | drug and alcohol abuse                        | 17     | online gaming                              |
| 1      | alcohol and other drug use                    | 17     | playing with people online                 |
| 1      | substance abuse                               | 18     | access to education                        |
| 2      | bullying                                      | 18     | access to school                           |
| 2      | bullying in person                            | 18     | easier access to education                 |
| 2      | bullying and cyberbullying                    | 18     | access to educational facilities or option |
| 2      | cyber bullying                                | 18     | access to community education              |
| 2      | bullying online                               | 18     | education                                  |
| 3      | parent or guardian support                    | 18     | engagement in education                    |
| 3      | support for new parents                       | 18     | positive engagement in education           |
| 3      | family                                        | 18     | school involvement                         |
| 3      | family engagement                             | 18     | attending school                           |
| 3      | parental engagement                           | 18     | going to school                            |
| 3      | family breakdown                              | 18     | education retention                        |
| 3      | family cohesion                               | 18     | value of education                         |
| 3      | healthy family relationships                  | 18     | value of education in the community        |
| 3      | family support services                       | 18     | attendance at school                       |
| 3      | supportive family unit                        | 18     | school attendance                          |
| 3      | family support and environment                | 19     | mentors                                    |
| 3      | supportive relationships                      | 19     | positive mentors                           |
| 4      | active transport                              | 19     | mentorship of young people                 |
| 4      | transport                                     | 20     | early intervention                         |
| 4      | access public transport                       | 20     | early intervention services                |
| 4      | access to public transport                    | 21     | socio economic level                       |
| 4      | access to transport                           | 21     | socioeconomic status                       |
| 4      | public transport                              | 21     | socio-economic disadvantage                |
| 4      | access to transport public, private or active | 22     | invasion of privacy                        |
| 4      | availability of public transport              | 22     | privacy                                    |
| 4      | transport availability                        | 23     | social media use                           |
| 4      | access to transport between towns             | 23     | use of social media                        |
| 4      | better public transport                       | 23     | social media                               |
| 4      | frequency of transport                        | 23     | social media addiction                     |
| 5      | affordability of health food                  | 23     | social media pressures                     |
| 5      | food affordability                            | 23     | targeted social media campaigns            |
| 5      | access to junk food                           | 24     | e-cigarettes                               |
| 5      | availability of junk food                     | 24     | vaping and e-cigarettes                    |
| 5      | access to fresh and healthy food options      | 24     | smoking or vaping                          |
| 5      | access to healthy food options                | 25     | community violence                         |
| 5      | access to healthy food                        | 25     | violence                                   |
| 5      | access to health food                         | 25     | family violence                            |
| 5      | access to food                                | 25     | reported family violence                   |

|   |                                                                 |    |                                                       |
|---|-----------------------------------------------------------------|----|-------------------------------------------------------|
| 5 | access to unhealthy food                                        | 25 | awareness family violence                             |
| 5 | availability of healthy food                                    | 25 | domestic violence                                     |
| 5 | consumption of healthy food                                     | 25 | youth violence                                        |
| 5 | eating healthy food                                             | 25 | witness violence between adults                       |
| 5 | healthy eating                                                  | 26 | poor role modelling                                   |
| 5 | healthy eating levels                                           | 26 | poor role models                                      |
| 5 | healthy food options                                            | 26 | good role modelling                                   |
| 5 | knowledge about healthy eating                                  | 26 | role modelling                                        |
| 5 | skills and knowledge of healthy food                            | 26 | role models                                           |
| 5 | unhealthy food choices                                          | 26 | healthy role modelling                                |
| 5 | healthy relationship with food                                  | 26 | role modelling of parents or carers                   |
| 5 | cost of healthy food                                            | 27 | confidence                                            |
| 5 | unhealthy food as rewards                                       | 27 | self confidence                                       |
| 5 | affordability                                                   | 27 | level of self-esteem                                  |
| 5 | access to culturally-appropriate food                           | 27 | self worth and self respect                           |
| 5 | access to dietitians and nutritionists                          | 28 | safety                                                |
| 5 | affordable and accessible housing                               | 28 | safety in public                                      |
| 5 | affordable housing                                              | 28 | community safety                                      |
| 5 | housing affordability                                           | 29 | cycle of trauma                                       |
| 5 | access to affordable and appropriate housing                    | 29 | trauma                                                |
| 5 | access to housing                                               | 30 | accessibility                                         |
| 5 | access to stable housing                                        | 30 | digital accessibility                                 |
| 5 | access to secure housing                                        | 31 | language barriers                                     |
| 5 | access to nutritious food at school canteens                    | 31 | language and cultural barriers                        |
| 5 | school canteen - affordability healthy food options             | 32 | family expectations                                   |
| 5 | affordable activities                                           | 32 | family pressure or family expectations                |
| 5 | healthy cooking lessons                                         | 33 | addressing the issue of homelessness for young people |
| 5 | access to affordable travel opportunities and simple activities | 33 | homelessness                                          |
| 5 | availability of fast food                                       | 34 | local professionals                                   |
| 6 | literacy and reading levels                                     | 34 | number of local professionals                         |
| 6 | literacy levels                                                 | 35 | gender discrimination                                 |
| 6 | literacy                                                        | 35 | gender equity                                         |
| 7 | community activities and events                                 | 35 | gender diversity                                      |
| 7 | community events                                                | 35 | discrimination                                        |
| 7 | knowledge of community activities                               | 35 | gender stereotypes                                    |
| 7 | community connection                                            | 35 | stereotype                                            |
| 7 | community connection and support                                | 35 | gender roles                                          |
| 7 | access to community support                                     | 36 | access to sugary drinks                               |
| 7 | social connection                                               | 36 | sugary drink consumption                              |
| 7 | social connection levels                                        | 37 | body image                                            |
| 7 | social interaction                                              | 37 | positive body image                                   |
| 7 | social engagement                                               | 38 | diversity of education opportunities                  |

|   |                                                    |    |                                                   |
|---|----------------------------------------------------|----|---------------------------------------------------|
| 7 | peer and social interactions                       | 38 | education about diversity                         |
| 7 | relationships with peers                           | 39 | identity                                          |
| 7 | appropriate opportunities for social connection    | 39 | sense of identity                                 |
| 7 | social opportunities                               | 39 | sense of self                                     |
| 7 | socialising with peers                             | 40 | food education                                    |
| 7 | appropriate social activities                      | 40 | food literacy                                     |
| 7 | socially active                                    | 41 | celebrations and visibility of cultural awareness |
| 7 | community groups                                   | 41 | cultural awareness                                |
| 7 | access to exercise                                 | 41 | cultural diversity                                |
| 7 | access to exercise facilities or gyms              | 41 | embracing diversity                               |
| 7 | exercise                                           | 41 | cultural backgrounds                              |
| 7 | physical activity                                  | 41 | culture                                           |
| 7 | exercise options                                   | 41 | cultural education and celebration                |
| 7 | physical activity levels                           | 41 | cultural inclusion                                |
| 7 | fitness                                            | 42 | community based resilience                        |
| 7 | unstructured physical activity or sport            | 42 | resilience                                        |
| 7 | non sporting activities                            | 43 | household income                                  |
| 7 | access to sport                                    | 43 | income                                            |
| 7 | access to sport and recreational activities        | 44 | advertising                                       |
| 7 | access to organised sport                          | 44 | promotions and advertising                        |
| 7 | participation in sport                             | 45 | lgbtqi+                                           |
| 7 | participation in sport or organised activity       | 45 | lgbtqia+                                          |
| 7 | participation in local sports and activities       | 45 | lgbtqia+ inclusion                                |
| 7 | participation in non organised sport or activities | 45 | lgbtqia+ encouragement                            |
| 7 | sport                                              | 45 | positive mental health of lgbtqia+ youth programs |
| 7 | team sports                                        | 46 | work                                              |
| 7 | sport options                                      | 46 | work skills                                       |
| 7 | limited opportunities for a range of sports        | 46 | skills                                            |
| 7 | fun activities and social sport options            | 47 | life experiences                                  |
| 7 | informal sport                                     | 47 | shared lived experiences                          |
| 7 | being physically active in the community           | 48 | excess screen time                                |
| 7 | peer support                                       | 48 | screen time                                       |
| 7 | access to health services                          | 48 | excessive tech use and screen time                |
| 7 | access to healthcare                               | 49 | amount of homework                                |
| 7 | knowledge of how to access health services         | 49 | doing homework                                    |
| 7 | access to free healthcare                          | 50 | access to early childhood education               |
| 7 | mental health                                      | 50 | supported transition to early years education     |
| 7 | mental ill health                                  | 51 | apprenticeship opportunities                      |
| 7 | mental health problems                             | 51 | work or apprenticeships                           |

|    |                                                  |    |                                                      |
|----|--------------------------------------------------|----|------------------------------------------------------|
| 7  | poor mental health                               | 51 | employment                                           |
| 7  | mental health well                               | 51 | workforce                                            |
| 7  | mental health wellness                           | 51 | employment opportunities                             |
| 7  | mental health and wellbeing                      | 51 | jobs available                                       |
| 7  | mental wellbeing                                 | 51 | local employment opportunities                       |
| 7  | access to mental health services                 | 51 | employment - shift work                              |
| 7  | access to mental health support                  | 51 | future career opportunities                          |
| 7  | availability and access to mental health support | 52 | financial problems                                   |
| 7  | mental health services                           | 52 | financial stress                                     |
| 7  | wellbeing                                        | 52 | anxiety                                              |
| 7  | mental health unwell                             | 52 | stress and anxiety                                   |
| 7  | access to mental health assessment               | 52 | stress                                               |
| 7  | mental health workshops                          | 52 | study-related stress                                 |
| 7  | physical wellbeing                               | 53 | sexual assault                                       |
| 7  | knowledge of positive mental health practices    | 53 | violence against children and sexual assault         |
| 7  | physical health                                  | 54 | activities after school                              |
| 7  | mental health in schools                         | 54 | lack of activities to do after school                |
| 7  | engagement with health services                  | 54 | out of school hours activities                       |
| 7  | health literacy                                  | 55 | service reliance                                     |
| 7  | mental health literacy                           | 55 | services capacity                                    |
| 7  | access to opportunities                          | 56 | leadership development                               |
| 7  | variety of activities                            | 56 | young person's leadership opportunities              |
| 7  | doing physical activity at home                  | 57 | access to places and programs for art and creativity |
| 8  | negative stigma                                  | 57 | access to the arts                                   |
| 8  | stigma                                           | 58 | climate change                                       |
| 9  | adequate sleep                                   | 58 | global warming                                       |
| 9  | quality sleep                                    | 59 | age or year level                                    |
| 9  | sleep                                            | 59 | your age or under 18                                 |
| 9  | sleeping                                         | 60 | food insecurity                                      |
| 9  | sleeping patterns                                | 60 | food security                                        |
| 10 | access to services                               | 61 | peer pressure                                        |
| 10 | access to services and programs                  | 61 | social pressure                                      |
| 10 | access to support services                       | 62 | access to parks                                      |
| 10 | knowledge of support services                    | 62 | access to public green spaces                        |
| 11 | youth voice                                      | 63 | volunteer opportunities                              |
| 11 | youth voice representation                       | 63 | volunteering opportunities                           |
| 11 | empowering youth voice                           | 63 | volunteering opportunities and work experience       |
| 12 | opportunities for youth participation            | 63 | volunteering hub                                     |
| 12 | youth participation                              | 64 | first nations heritage                               |
| 13 | parent education                                 | 64 | traditional owners and first nations                 |
| 13 | parental education attainment                    | 65 | access to safe youth spaces                          |
| 13 | parent involvement in children's education       | 65 | youth drop-in spaces                                 |

|    |                            |    |                                                     |
|----|----------------------------|----|-----------------------------------------------------|
| 14 | disordered eating          | 66 | infrastructure e.g. roads footpaths street lighting |
| 14 | eating disorders           | 66 | streetlights                                        |
| 15 | covid                      |    |                                                     |
| 15 | covid19                    |    |                                                     |
| 15 | covid-19 impacts           |    |                                                     |
| 15 | covid cases                |    |                                                     |
| 16 | isolated socially          |    |                                                     |
| 16 | social isolation           |    |                                                     |
| 16 | social exclusion           |    |                                                     |
| 16 | isolation                  |    |                                                     |
| 16 | disconnection or isolation |    |                                                     |
| 16 | geographic isolation       |    |                                                     |
